# Supplementary material
Source: PubMed Central journal article supplement (PMC2766669)

| Table S1: List of CLASP1 interactors identified by mass spectrometry analysis.                                                                                            | Sequence Coverage (%) |
|---------------------------------------------------------------------------------------------------------------------------------------------------------------------------|-----------------------|
| restin isoform b; cytoplasmic linker 1; Reed-Steinberg cell-expressed intermediate filament-associated protein [Homo sapiens] (CLIP-170)                                  | 43,7                  |
| restin isoform a; cytoplasmic linker 1; Reed-Steinberg cell-expressed intermediate filament-associated protein [Homo sapiens]                                             | 43,2                  |
| GRIP coiled-coil protein GCC185 isoform b; CTCL tumor antigen se1-1; CLL-associated antigen KW-11; GRIP and coiled-coil domain-containing 2 [Homo sapiens]                | 41,9                  |
| GRIP coiled-coil protein GCC185 isoform a; CTCL tumor antigen se1-1; CLL-associated antigen KW-11; GRIP and coiled-coil domain-containing 2 [Homo sapiens]                | 41,6                  |
| mitotic spindle coiled-coil related protein [Homo sapiens] (Astrin)                                                                                                       | 29,2                  |
| PREDICTED: chromosome 15 open reading frame 23 [Homo sapiens]                                                                                                             | 28,2                  |
| lipocalin 1 precursor; lipocalin 1 (protein migrating faster than albumin, tear prealbumin); Von Ebner gland protein; tear lipocalin [Homo sapiens]                       | 19,9                  |
| centromere protein J; centrosomal P4.1-associated protein; LYST-interacting protein LIP1; LAG-3-associated protein [Homo sapiens] (CENP-J)                                | 16,3                  |
| PREDICTED: similar to Heat shock cognate 71 kDa protein [Homo sapiens]                                                                                                    | 16                    |
| KIAA0802 [Homo sapiens]                                                                                                                                                   | 15,4                  |
| MAP/microtubule affinity-regulating kinase 2 isoform a; ELKL motif kinase; ELKL motif kinase 1 [Homo sapiens] (MARK2)                                                     | 13,2                  |
| PREDICTED: similar to epsilon isoform of 14-3-3 protein [Homo sapiens] (14-3-3)                                                                                           | 11,9                  |
| PREDICTED: similar to tyrosine 3/tryptophan 5-monooxygenase activation protein, epsilon polypeptide; 14-3-3 epsilon; mitochondrial import stimulation factor L            | 10,2                  |
| sonic hedgehog preproprotein [Homo sapiens]                                                                                                                               | 9,3                   |
| pleckstrin homology-like domain, family B, member 2; LL5 beta [Homo sapiens]                                                                                              | 8,4                   |
| sine oculis homeobox homolog 3; holoprosencephaly 2, alobar or semilobar [Homo sapiens]                                                                                   | 8,1                   |
| centromere protein E; Centromere autoantigen E (312kD); centromere protein E (312kD); kinesin family member 10 [Homo sapiens] (CENP-E)                                    | 7,2                   |
| galectin 3 binding protein; L3 antigen; Mac-2-binding protein; serum protein 90K [Homo sapiens]                                                                           | 7,2                   |
| hemopexin [Homo sapiens]                                                                                                                                                  | 6,1                   |
| FLJ44670 protein [Homo sapiens]                                                                                                                                           | 5,5                   |
| Rab6-interacting protein 2 isoform alpha [Homo sapiens]                                                                                                                   | 5                     |
| albumin precursor; PRO0883 protein [Homo sapiens]                                                                                                                         | 4,8                   |
| PREDICTED: CLIP-associating protein 2 [Homo sapiens] (CLASP-2)                                                                                                            | 4,4                   |
| desmoglein 1 preproprotein; desmosomal glycoprotein 1 [Homo sapiens]                                                                                                      | 4,2                   |
| ninein isoform 4; GSK3B-interacting protein; ninein centrosomal protein; glycogen synthase kinase 3 beta-interacting protein [Homo sapiens] (Ninein)                      | 4,1                   |
| cytoplasmic linker 2 isoform 1; Williams-Beuren syndrome chromosome region 4 [Homo sapiens]                                                                               | 3,7                   |
| KIAA0889 protein [Homo sapiens]                                                                                                                                           | 3,5                   |
| MAP/microtubule affinity-regulating kinase 3 [Homo sapiens] (MARK3)                                                                                                       | 3,4                   |
| replication factor C large subunit; replication factor C1; replication factor C (activator 1) 1 (145kD); MHC binding factor, beta [Homo sapiens]                          | 3,3                   |
| catenin (cadherin-associated protein), alpha 2; Catenin, alpha-2 (cadherin-associated protein, related) [Homo sapiens]                                                    | 3,3                   |
| hypothetical protein MGC45562 [Homo sapiens]                                                                                                                              | 3,1                   |
| transient receptor potential cation channel, subfamily V, member 1; capsaicin receptor; vanilloid receptor subtype 1 [Homo sapiens]                                       | 2,7                   |
| cytoplasmic linker 2 isoform 2; Williams-Beuren syndrome chromosome region 4 [Homo sapiens]                                                                               | 2,3                   |
| paternally expressed 3; paternally expressed gene 3; pEg3 kinase [Homo sapiens]                                                                                           | 2,1                   |
| alpha 1 type XII collagen short isoform precursor [Homo sapiens]                                                                                                          | 1,8                   |
| RAN-binding protein 2-like 1 isoform 1; sperm membrane protein BS-63; RAN-binding protein 2-like 1 [Homo sapiens]                                                         | 1,5                   |
| microfilament and actin filament cross-linker protein isoform b; actin cross-linking factor; 620 kDa actin binding protein; macrophin 1; trabeculin-alpha; [Homo sapiens] | 1,4                   |
| PI-3-kinase-related kinase SMG-1 isoform 2; phosphatidylinositol 3-kinase-related protein kinase; lambda/iota protein kinase C-interacting protein [Homo sapiens]         | 1,3                   |
| neurofibromin; Neurofibromin (neurofibromatosis, type I) [Homo sapiens]                                                                                                   | 1,3                   |
| fatty acid synthase [Homo sapiens]                                                                                                                                        | 1                     |
| cubilin; intrinsic factor-cobalamin receptor; intrinsic factor B12-receptor [Homo sapiens]                                                                                | 0,9                   |
| PREDICTED: similar to RAN-binding protein 2-like 1 isoform 1; sperm membrane protein BS-63; RAN-binding protein 2-like 1 [Homo sapiens]                                   | 0,9                   |
| MDN1, midasin homolog [Homo sapiens]                                                                                                                                      | 0,6                   |

Figure S1

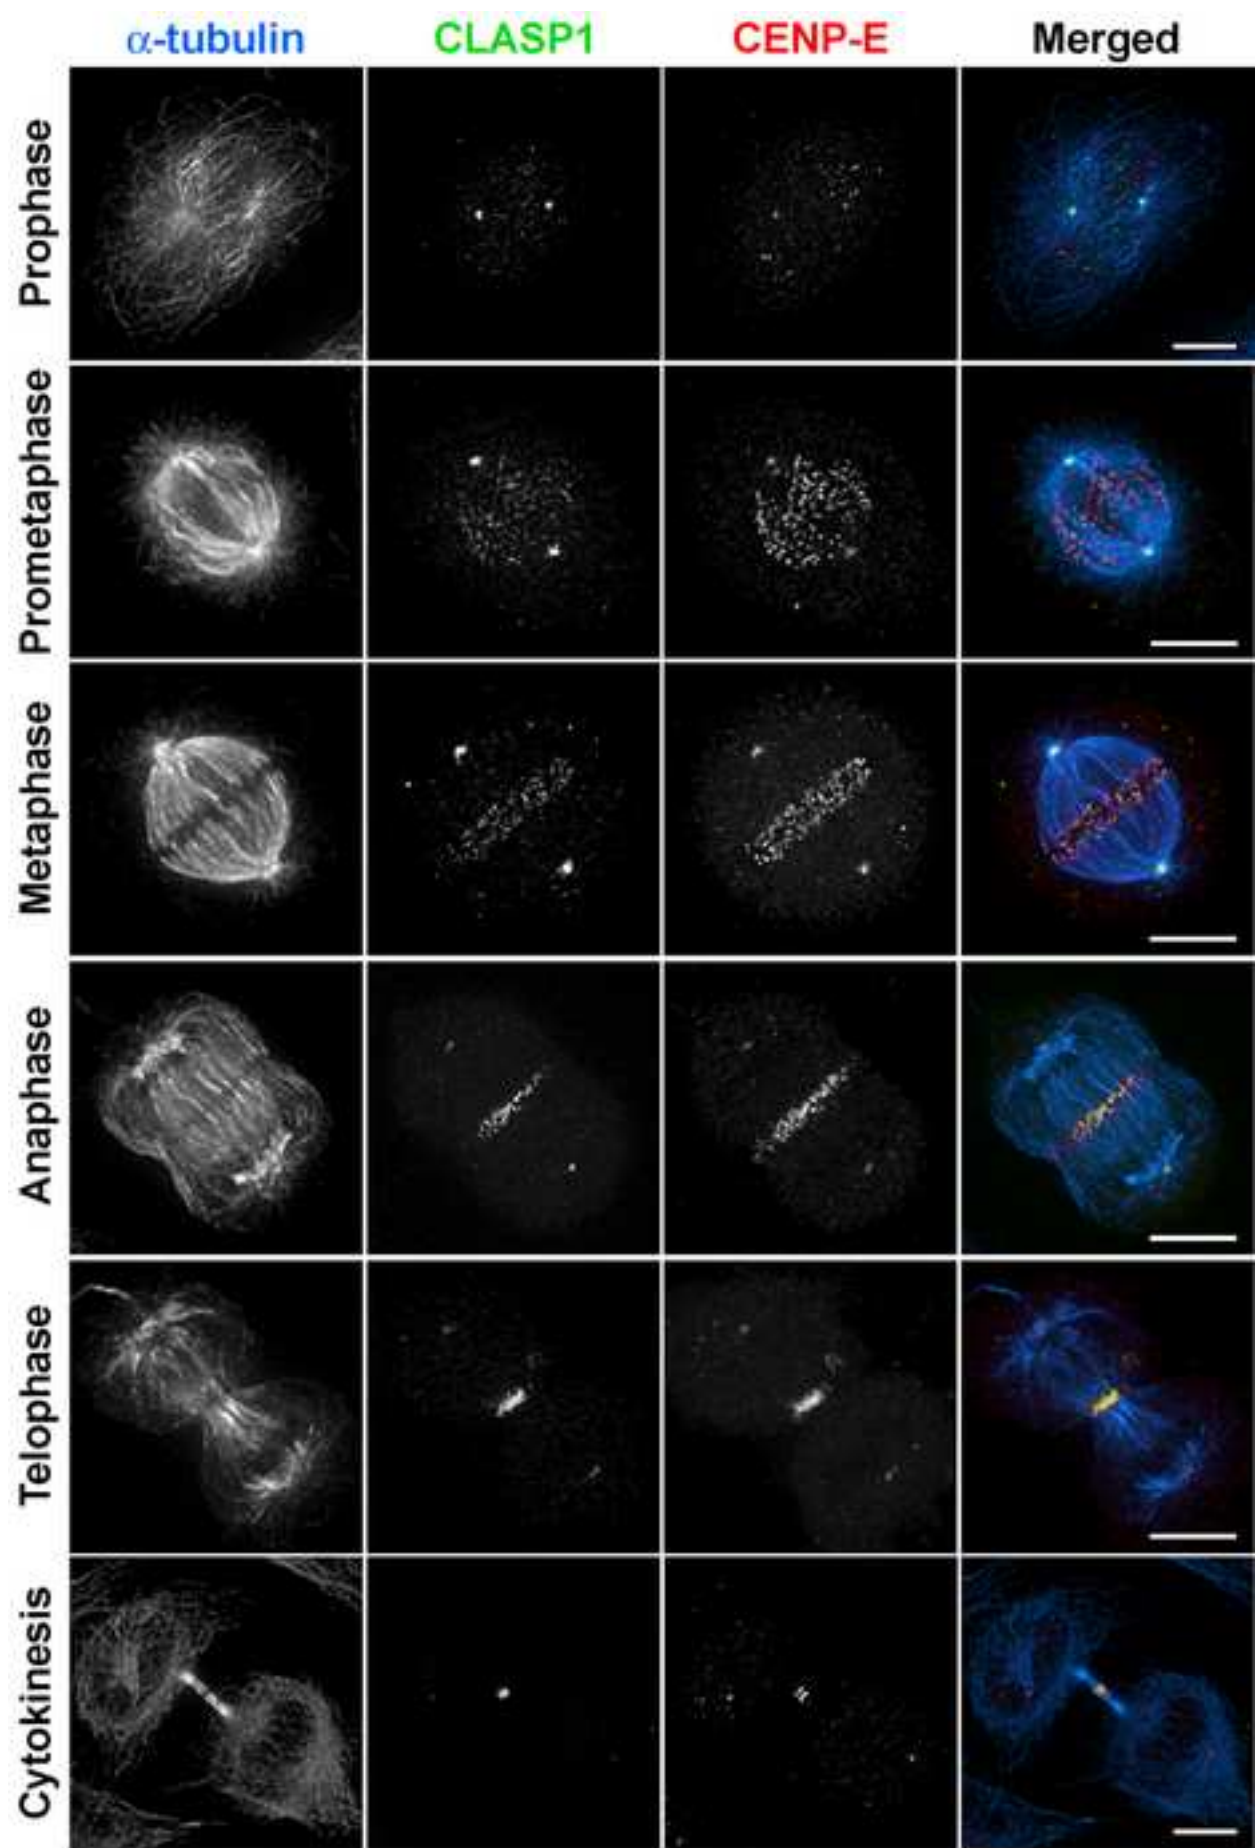

Sup. Figure 1 - Maffini et al.,

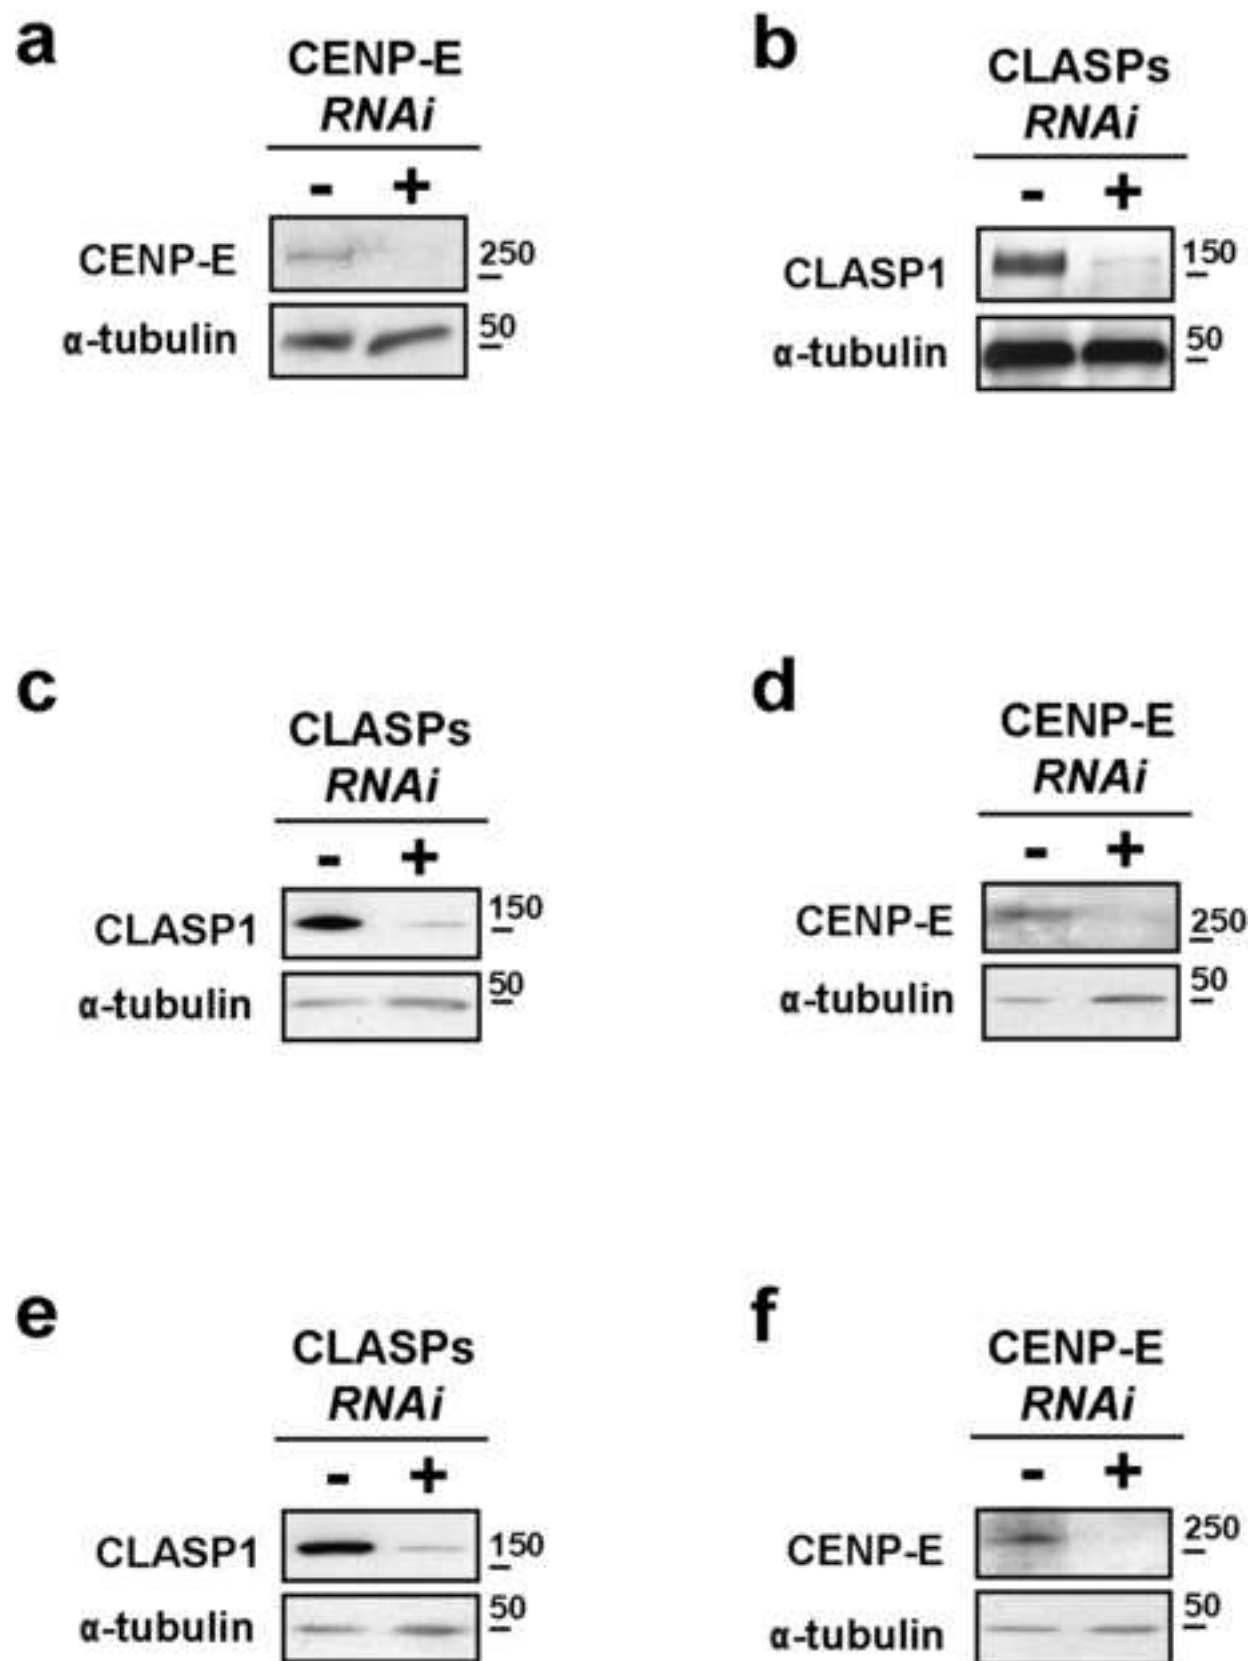

Sup. Figure 2 - Maffini et al.,

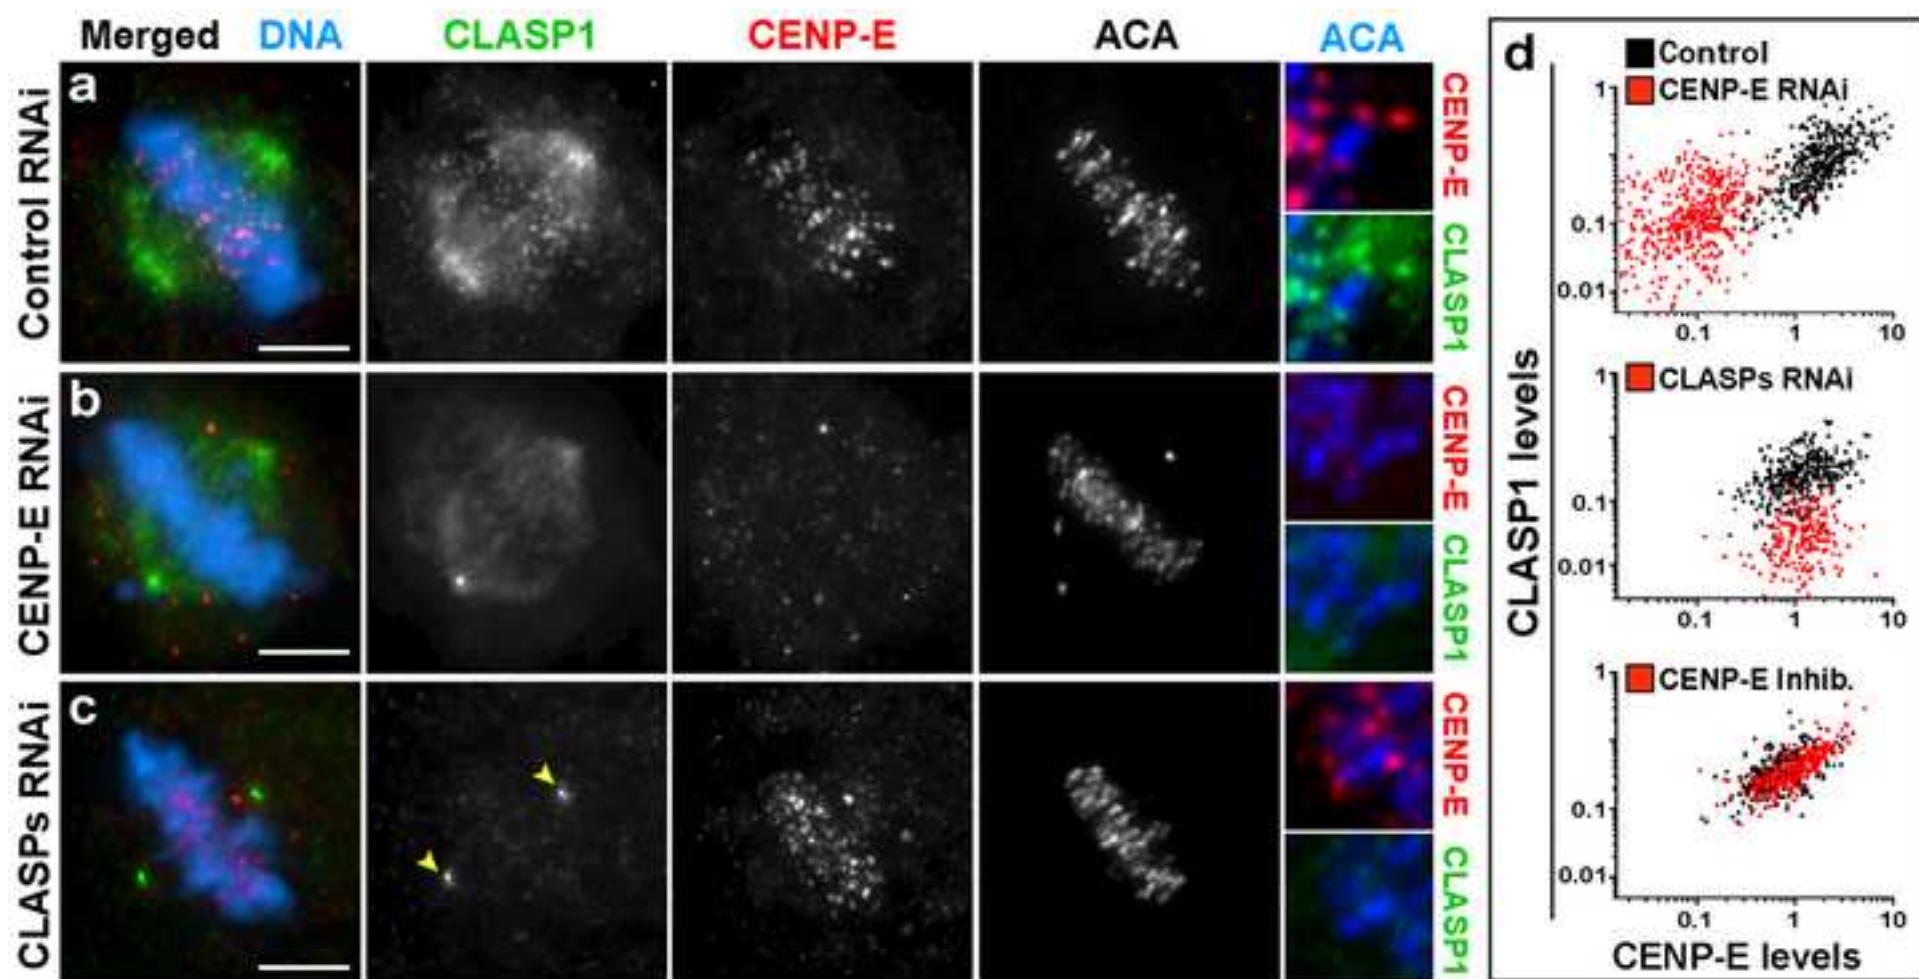

Sup. Figure 3 - Maffini et al.,

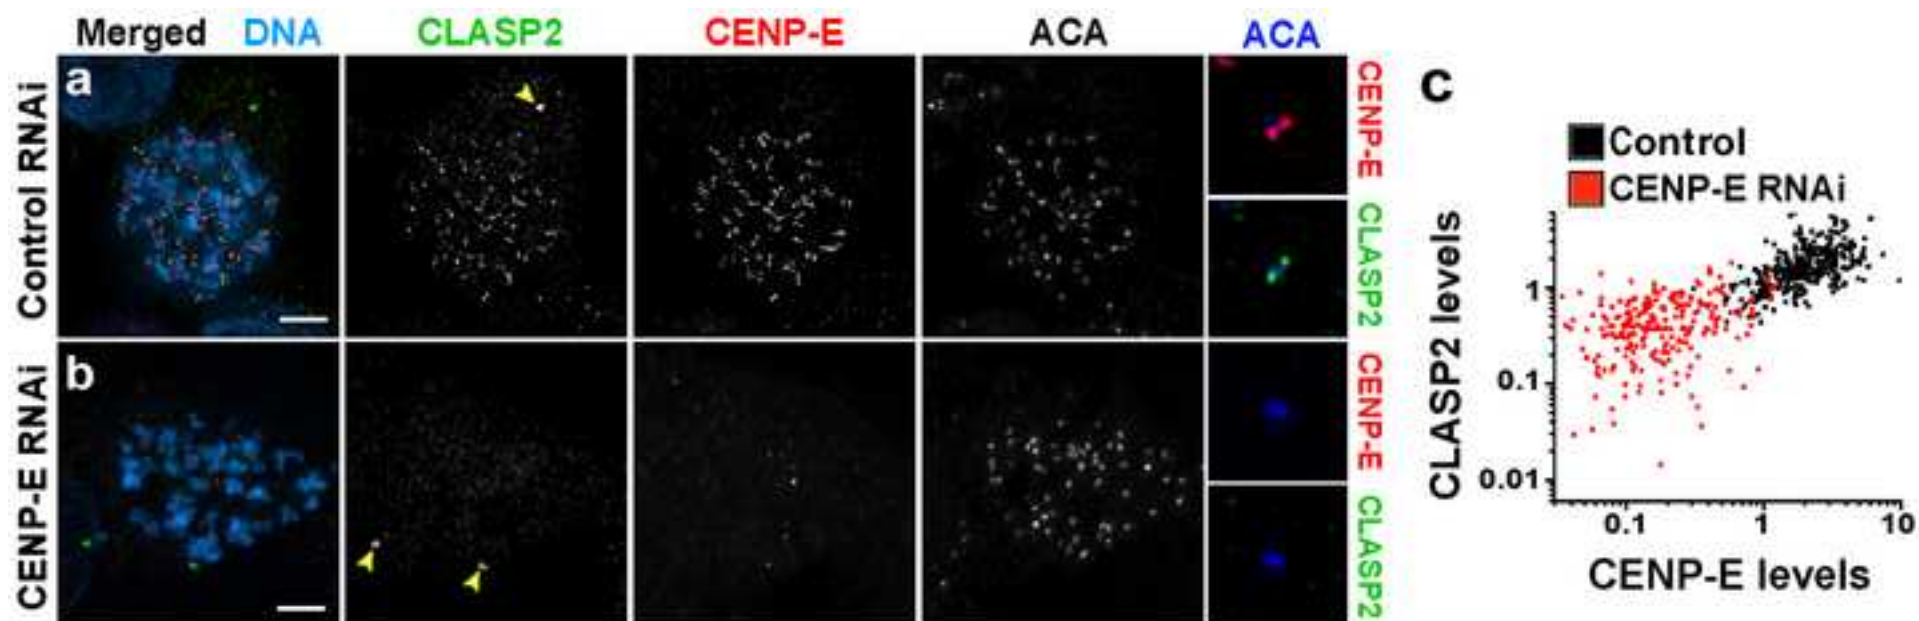

Sup.Figure 4- Maffini et al.,



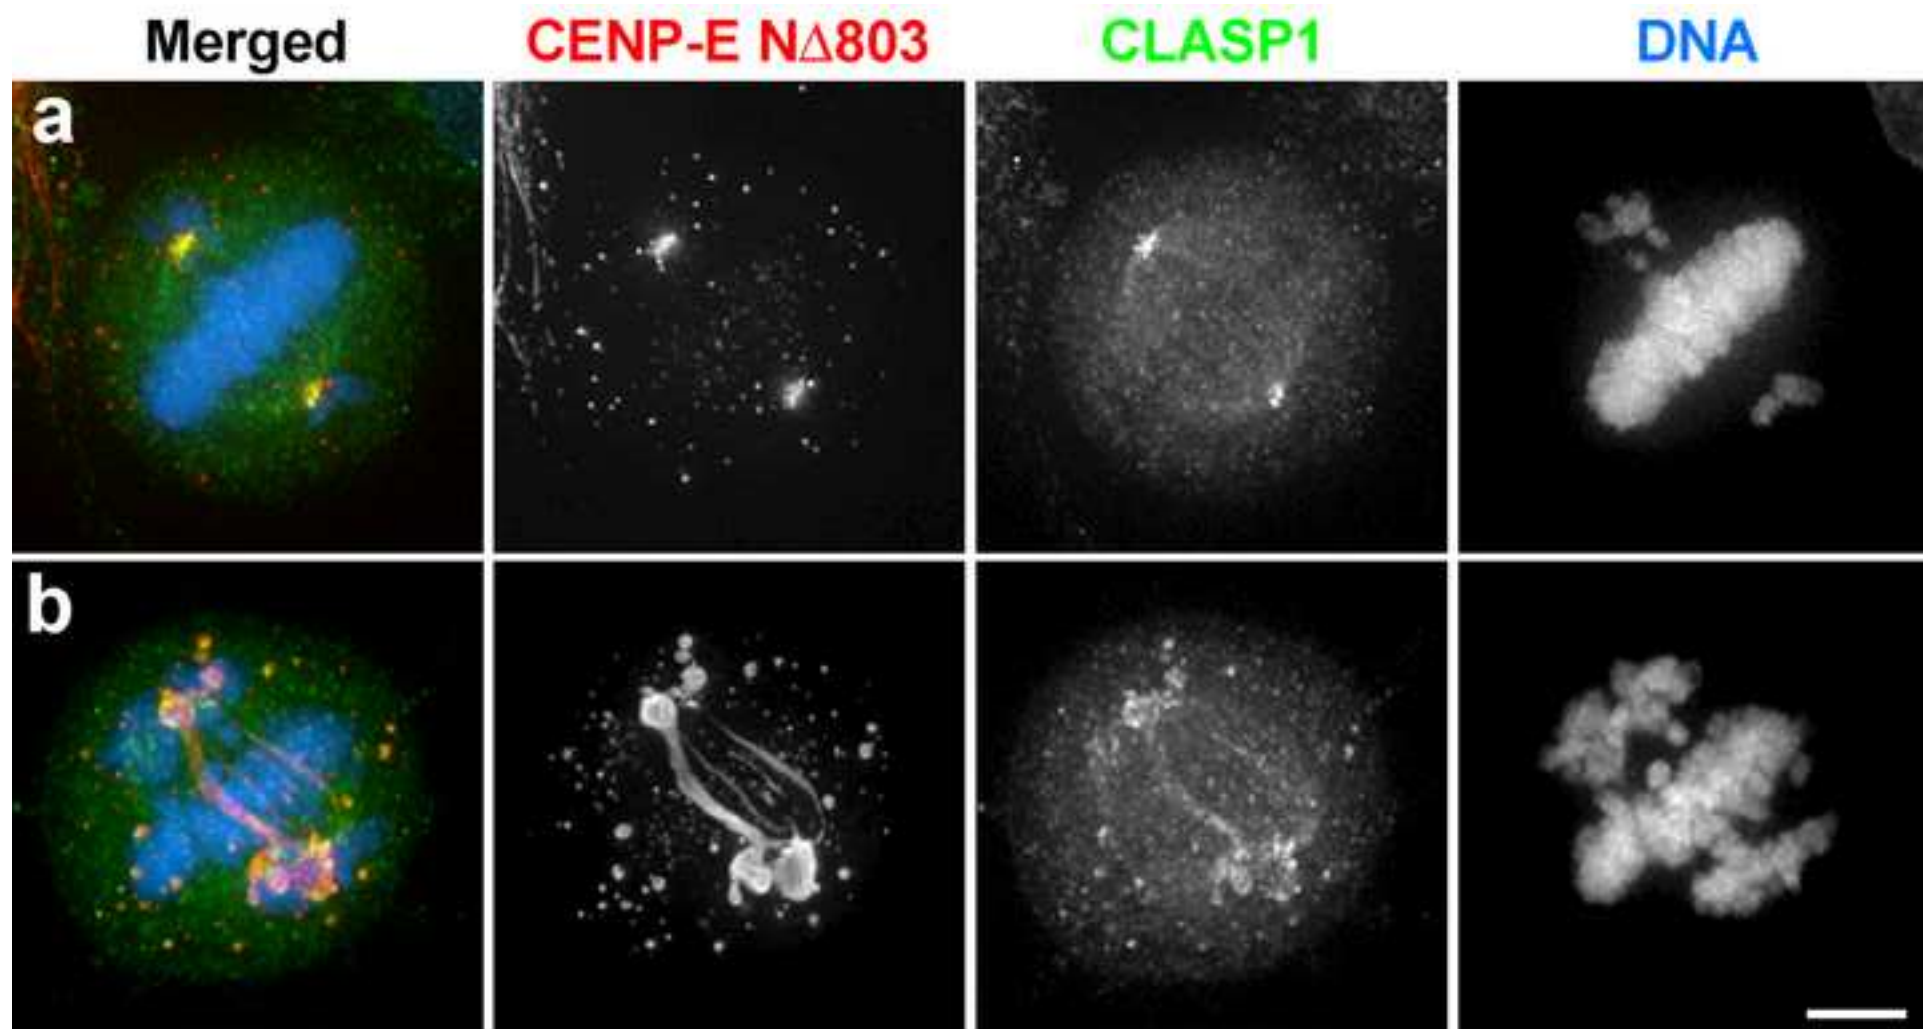

Sup. Figure 5 - Maffini et al.,

**a**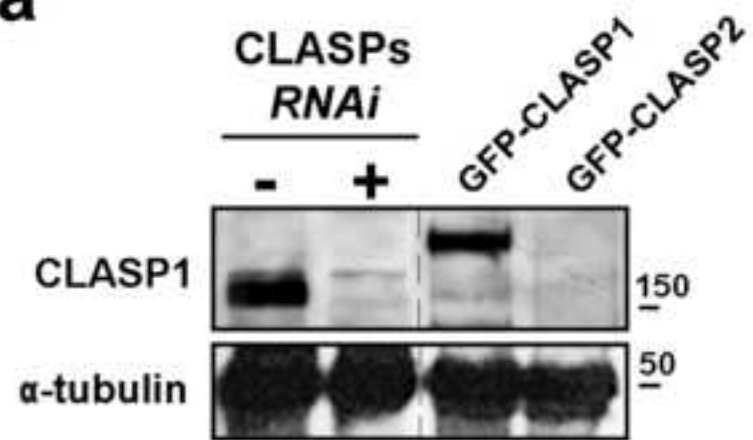**b**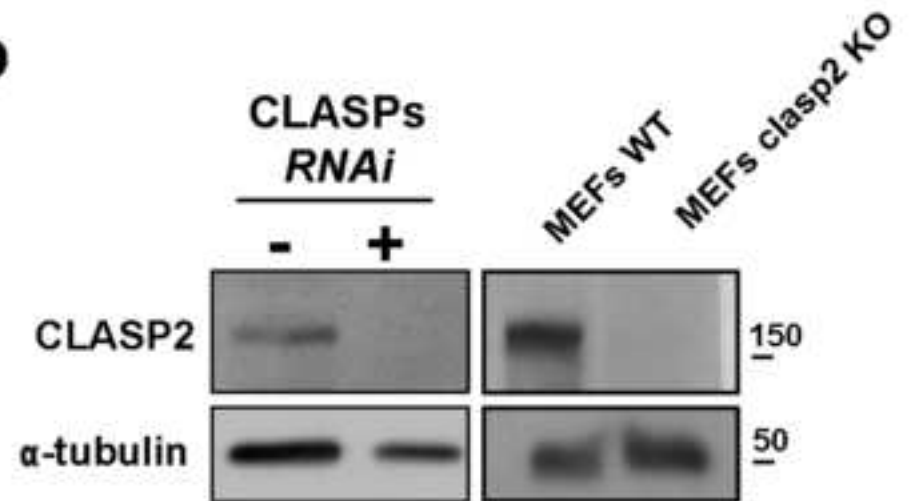

Sup. Figure 6 - Maffini et al.,

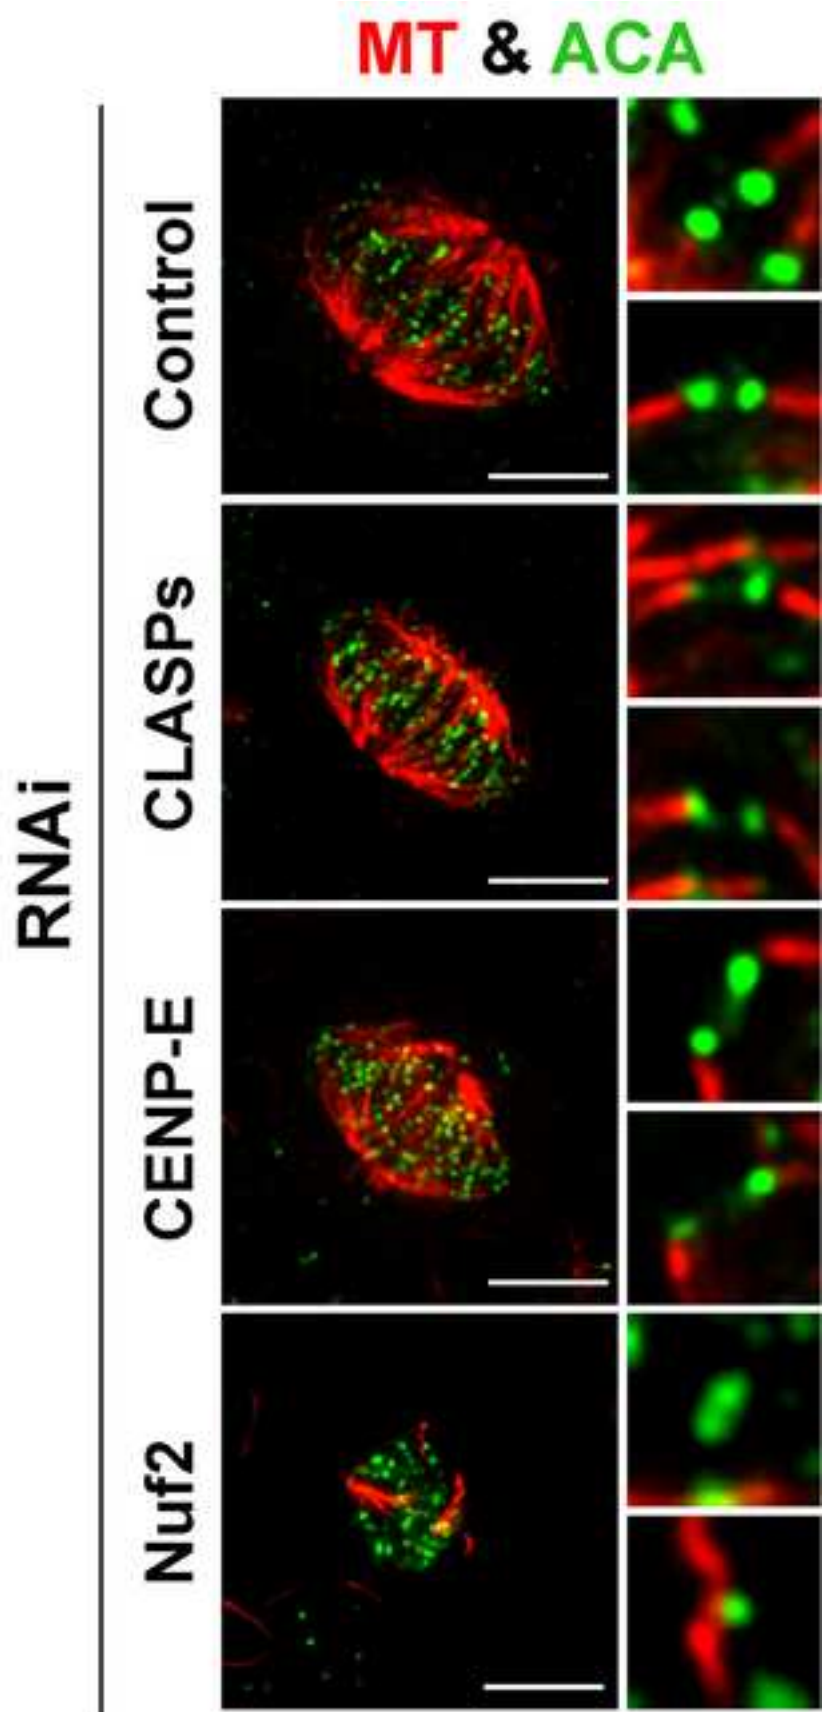

Sup. Figure 7- Maffini et al.,



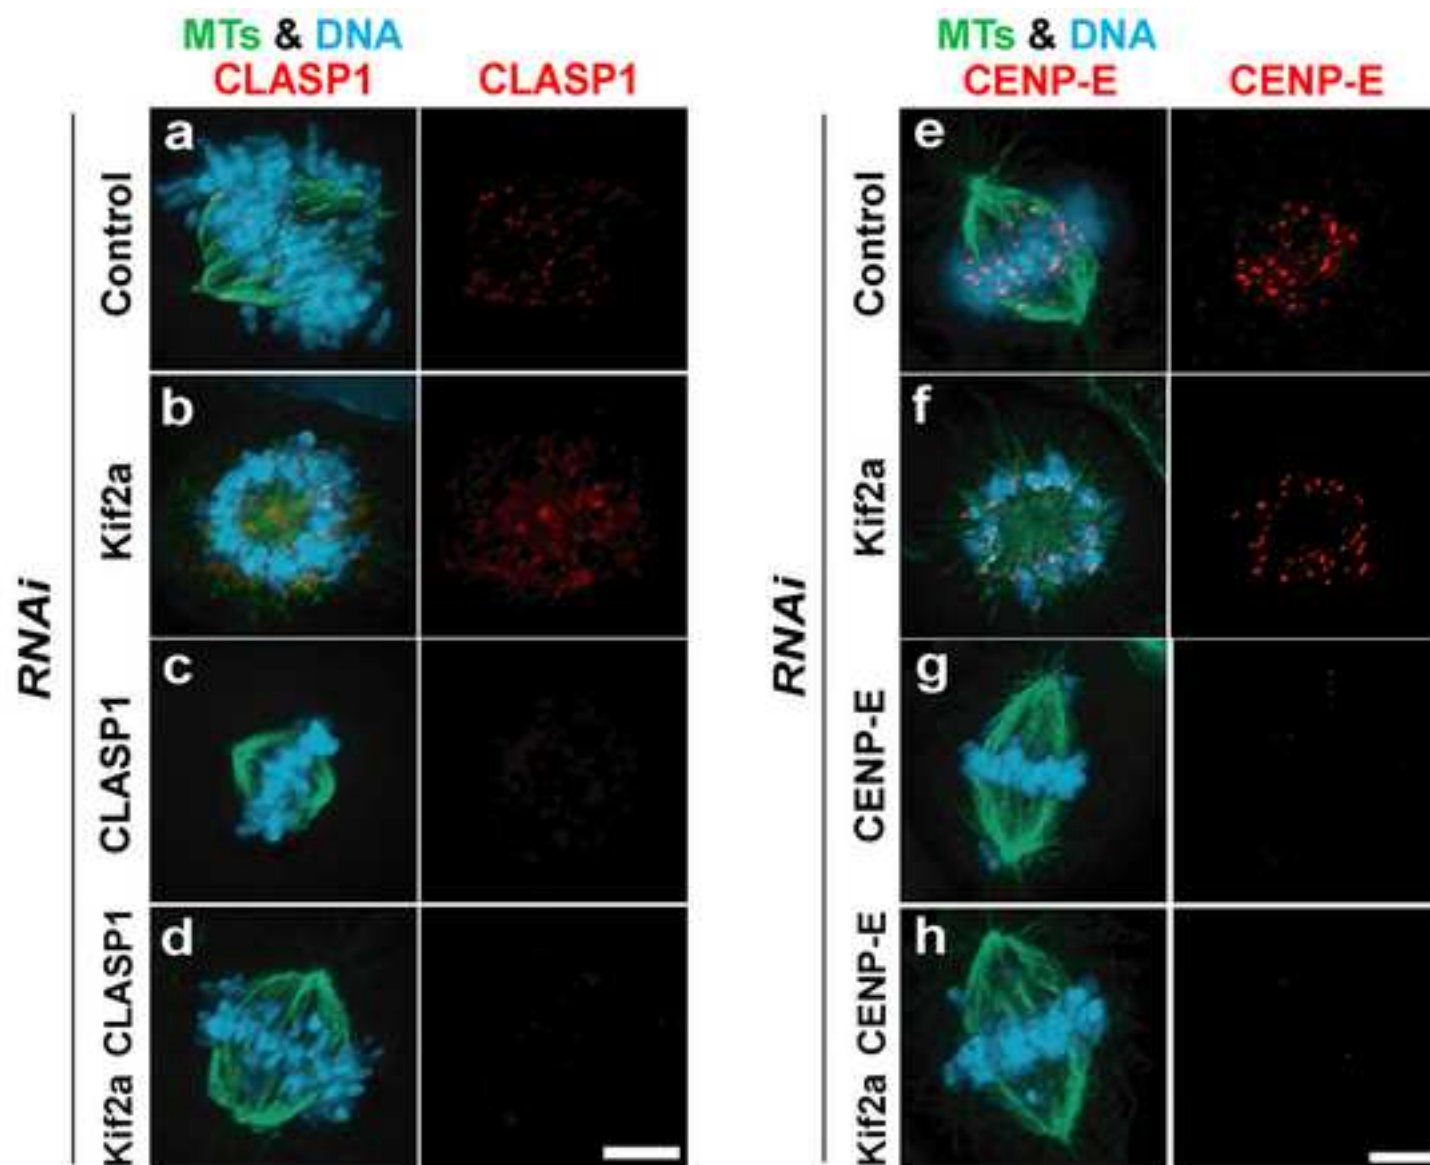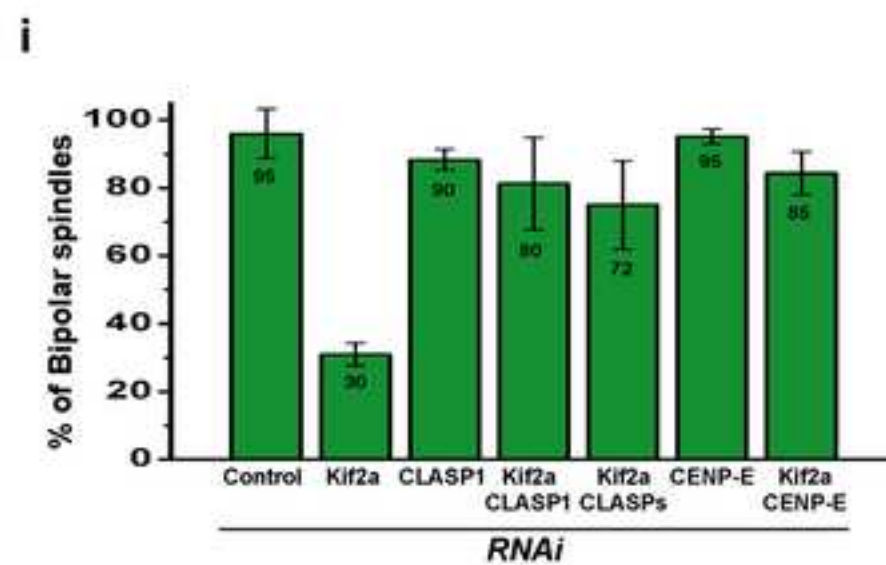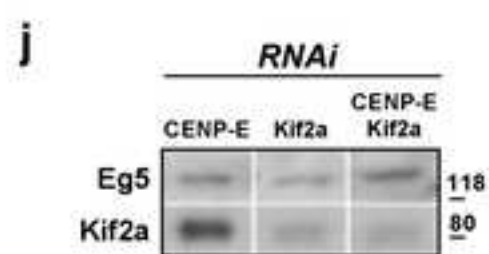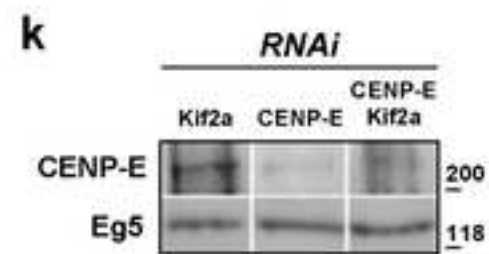

Supplement: NIHMS136366-supplement-01.pdf [file NIHMS136366-supplement-01.pdf]
